# Supplementary material for: Localized charge-induced ORR/OER activity in doped fullerenes for Li–air battery applications
Source: Royal Society of Chemistry journal article supplement (doi:10.1039/d3nr05309a), 2024-01-01
Supplement: d3nr05309a1.pdf [file d3nr05309a1.pdf]

## Localized Charge Induced ORR/OER Activity in Doped Fullerenes for Li-Air Battery Applications

Nishchal Bharadwaj,<sup>†</sup> and Biswarup Pathak<sup>†\*</sup>

<sup>†</sup>Department of Chemistry, Indian Institute of Technology Indore, Indore 453552, India

\*E-mail: [biswarup@iiti.ac.in](mailto:biswarup@iiti.ac.in)

### Contents:

**Table S1:** Total energies (in eV) of all the considered systems using different  $\Gamma$ -centered k-point grids.

**Figure S1.** Optimized structures for considered (a) N, B-doped, and (b) BN co-doped  $C_{180}$  fullerenes.

**Text S1:** Stability Analysis of doped and co-doped fullerenes.

**Figure S2:** Adsorbed intermediate configuration corresponding to their most stable sites on (a) N-doped and (b) B-doped  $C_{180}$  fullerenes.

**Figure S3:** Adsorbed intermediate configuration corresponding to their most stable sites on (a)  $C_{58}BN$  and (b)  $C_{178}BN$  fullerenes.

**Text S2:** Equations used to calculate the B-binding energy in B-doped fullerenes in the presence of oxidative intermediates.

**Table S2:** B-binding energy in B-doped fullerenes in the presence of oxidative  $LiO_2$  and  $Li_4O_4$  intermediates and adsorption energies of the oxidative  $LiO_2$  and  $Li_4O_4$  intermediates.

**Text S3:** Details of ZPE and entropy correction calculations.

**Table S3:** Free energy values with the DMSO solvent for  $C_{179}B$  fullerene.

**Table S1:** Total energies (in eV) of all the considered systems using different  $\Gamma$ -centered k-point grids.

| Systems     | $1 \times 1 \times 1$ k-point | $3 \times 3 \times 3$ k-point | $5 \times 5 \times 5$ k-point |
|-------------|-------------------------------|-------------------------------|-------------------------------|
| $C_{59}B$   | -529.8502                     | -529.8501                     | -529.8503                     |
| $C_{59}N$   | -531.8856                     | -531.8854                     | -531.8857                     |
| $C_{179}B$  | -1631.5633                    | -1631.5587                    | Not converged                 |
| $C_{179}N$  | -1634.3953                    | -1634.3912                    | Not converged                 |
| $C_{58}BN$  | -530.7630                     | -530.7628                     | -530.7631                     |
| $C_{178}BN$ | -1632.2689                    | -1632.2684                    | Not converged                 |

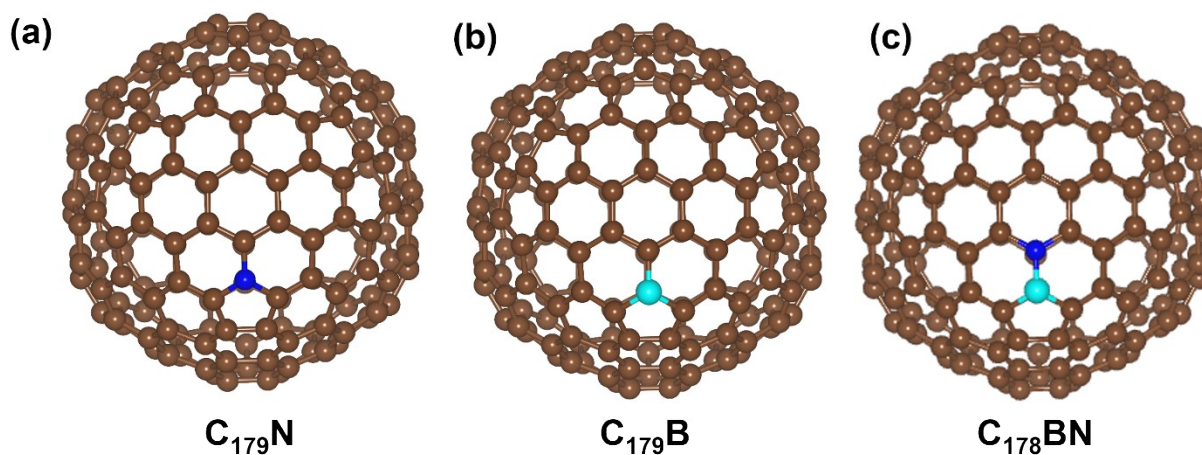

**Figure S1.** Optimized structures for considered (a) N, B-doped, and (b) BN co-doped C<sub>180</sub> fullerenes. Here, the blue, brown, and cyan colors represent nitrogen, carbon, and boron atoms respectively.

**Text S1:** Stability Analysis of doped and co-doped fullerenes.

To assess the stability of the considered doped fullerenes, the formation energy<sup>1</sup> ( $E_f$ ) has been calculated as follows,

$$E_f = E_{B_x N_y C_{m-x-y}} + (x+y)\mu_C - (E_{C_m} + x\mu_B + y\mu_N) \quad (1)$$

Here, x (=0,1) and y (=0,1,2,3) are the number of doped B and N atoms in the C<sub>m</sub> fullerene (m=60,180). Here,  $E_{B_x N_y C_{m-x-y}}$ , and  $E_{C_m}$ , represents the optimized energies of the respective doped and undoped fullerenes.  $\mu_C$ ,  $\mu_B$ , and  $\mu_N$  stands for the chemical potential taken from fullerene, boron bulk, and N<sub>2</sub> gas, respectively. In addition, to evaluate the durability and stability of co-doped fullerenes, we examined the binding energy<sup>1</sup> of the B atom within these structures. The binding energy of the B atom ( $E_b$ ) at the single vacancy site is calculated using the **Equation 2**,

$$E_b = E_{BN_y C_{(m-1-y)}} - E_B - E_{N_y C_{(m-1-y)}} \quad (2)$$

Where, y (=1,2,3) are number of doped N atoms around doped B atom in the C<sub>m</sub> fullerene (m=60,180). The  $E_{BN_y C_{(m-1-y)}}$  is the optimized energy of co-doped fullerene,  $E_B$  is the energy of a single B atom, and  $E_{N_y C_{(m-1-y)}}$  is the energy of B vacancy defective fullerene.

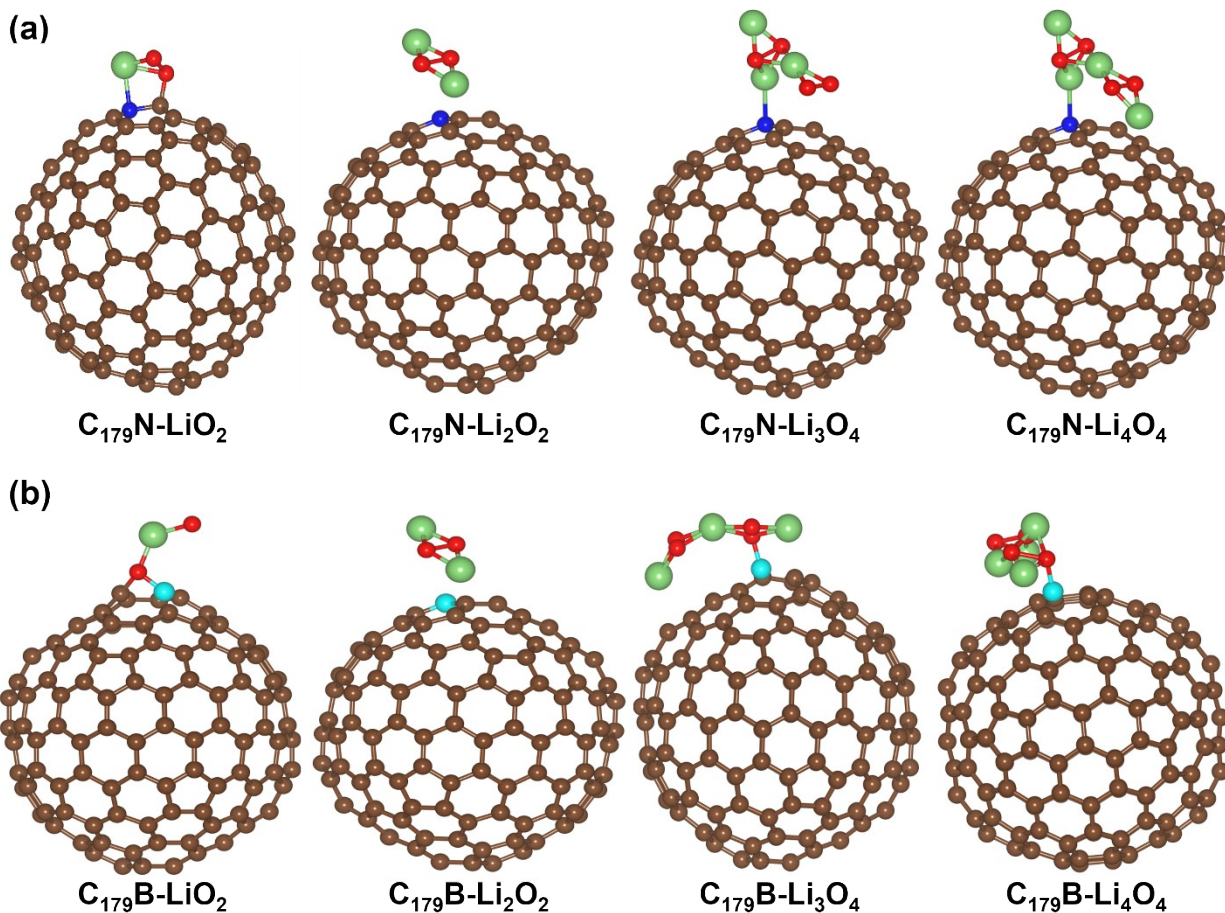

**Figure S2:** Adsorbed intermediate configuration corresponding to their most stable sites on (a) N-doped and (b) B-doped  $C_{180}$  fullerenes. Here, the blue, brown, cyan, green, and red colors represent nitrogen, carbon, boron, lithium, and oxygen atoms respectively.

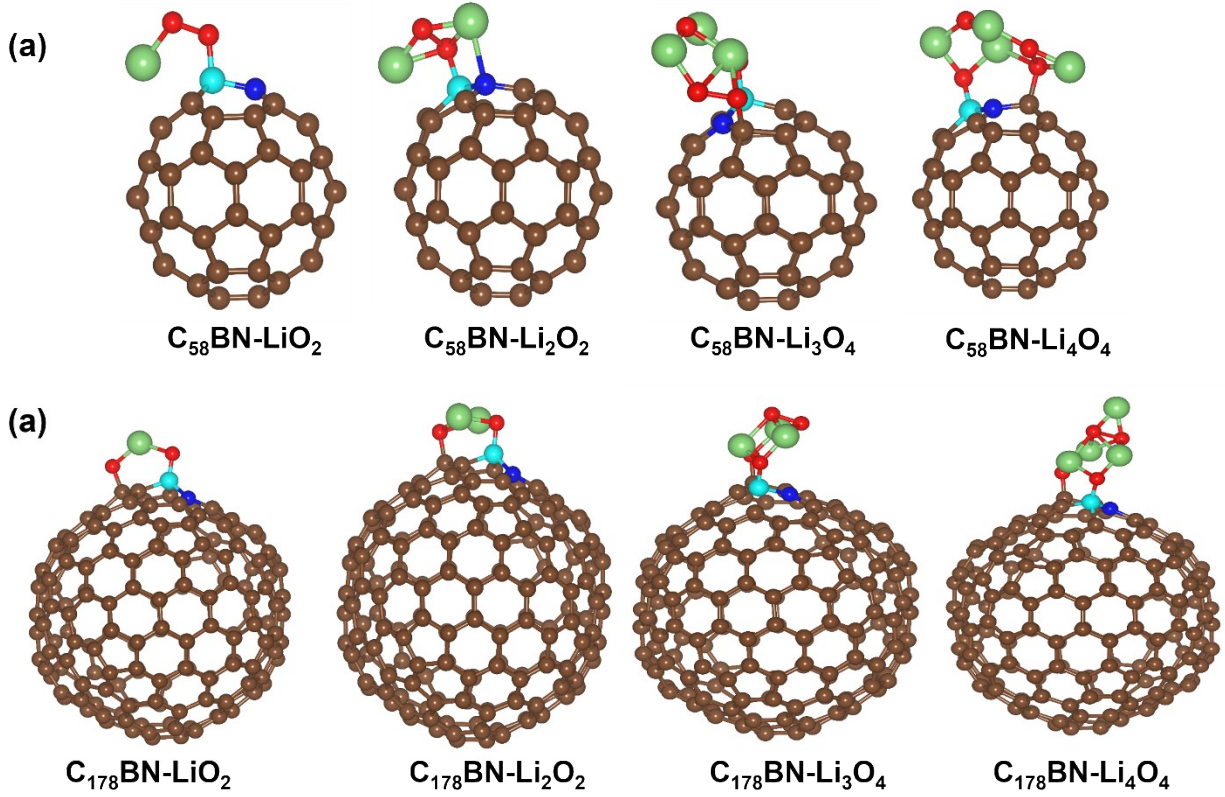

**Figure S3:** Adsorbed intermediate configuration corresponding to their most stable sites on (a)  $C_{58}BN$  and (b)  $C_{178}BN$  fullerenes. Here, the blue, brown, cyan, green, and red colors represent nitrogen, carbon, boron, lithium, and oxygen atoms respectively.

**Text S2:** Equations used to calculate the B-binding energy in B-doped fullerenes in the presence of oxidative intermediates.

For binding energy of B in  $LiO_2$  adsorbed ( $E_{B-LiO_2}$ ) and  $Li_4O_4$  adsorbed systems ( $E_{B-Li_4O_4}$ ), we have considered the following equations,

$$E_{B-LiO_2} = E_{BN_yC_{(m-1-y)}LiO_2} - E_B - E_{N_yC_{(m-1-y)}LiO_2}$$

$$E_{B-Li_4O_4} = E_{BN_yC_{(m-1-y)}Li_4O_4} - E_B - E_{N_yC_{(m-1-y)}Li_4O_4}$$

Where,  $E_{BN_yC_{(m-1-y)}LiO_2}$  and  $E_{BN_yC_{(m-1-y)}Li_4O_4}$  are total energies of LiO<sub>2</sub> adsorbed and Li<sub>4</sub>O<sub>4</sub> adsorbed fullerenes, respectively.  $E_{N_yC_{(m-1-y)}LiO_2}$  and  $E_{N_yC_{(m-1-y)}Li_4O_4}$  are the single-point energies of the respective adsorbed fullerenes without B atom.  $E_B$  is the single point energies of B atom.

**Table S2:** B-binding energy in B-doped fullerenes in the presence of oxidative LiO<sub>2</sub> and Li<sub>4</sub>O<sub>4</sub> intermediates and adsorption energies of the oxidative LiO<sub>2</sub> and Li<sub>4</sub>O<sub>4</sub> intermediates.

| Systems                  | $E_{B-LiO_2}$<br>(eV) | $E_{B-Li_4O_4}$<br>(eV) | LiO <sub>2</sub> Adsorption<br>energy (eV) | Li <sub>4</sub> O <sub>4</sub> Adsorption<br>energy (eV) |
|--------------------------|-----------------------|-------------------------|--------------------------------------------|----------------------------------------------------------|
| <b>C<sub>179</sub>B</b>  | -17.09                | -14.12                  | -5.95                                      | -9.12                                                    |
| <b>C<sub>59</sub>B</b>   | -12.72                | -12.03                  | -2.94                                      | -9.43                                                    |
| <b>C<sub>178</sub>BN</b> | -14.06                | -14.83                  | -2.59                                      | -5.17                                                    |
| <b>C<sub>58</sub>BN</b>  | -13.18                | -14.53                  | -3.09                                      | -5.88                                                    |

**Text S3:** Details of ZPE and entropy correction calculations

The zero-point energy (ZPE) can be calculated using the  $\sum \frac{1}{2}hv_i$  equation, where  $h$  and  $v_i$  define the Planck's constant and the vibrational frequencies of the intermediates, respectively. There will be contributions to entropy from each atom's translational, rotational and vibrational degrees of freedom. In general, for intermediates adsorbed on solid material-based catalysts, translational and rotational entropies are negligible, while vibrational entropy ( $S_v$ ) is calculated using the following statistical thermodynamic equation.<sup>2</sup>

$$S_V = R \sum \left( \frac{\hbar \nu_i}{k_B T \left( \exp\left(\frac{\hbar \nu_i}{kT} - 1\right) \right)} - \ln\left(1 - \exp\left(\frac{-\hbar \nu_i}{kT}\right)\right) \right)$$

Here,  $k_B$  is the Boltzmann constant  $T$  is the temperature, and  $\hbar = h/2\pi$ . To incorporate the thermal energy contribution, we have calculated the free energy change of each step of the reaction at 300 K and further the entropy contribution has also been considered at the same temperature. The reaction free energies reported here are ZPE-corrected free energies.

**Table S3:** Stepwise LAB reaction free energies for the  $C_{179}B$  fullerene in the gas phase and implicit DMSO solvent phase.

| Steps                                                                      | Reaction free energy (eV) |               |
|----------------------------------------------------------------------------|---------------------------|---------------|
|                                                                            | Gas phase                 | Solvent phase |
| $* + 4(Li^+ + e^-) + 2O_2 \leftrightarrow LiO_2 * + 3(Li^+ + e^-)$         | -4.71                     | -1.52         |
| $LiO_2 * + 3(Li^+ + e^-) + O_2 \leftrightarrow Li_2O_2 * + 2(Li^+ + e^-)$  | -4.48                     | -0.84         |
| $Li_2O_2 * + 2(Li^+ + e^-) + O_2 \leftrightarrow Li_3O_4 * + (Li^+ + e^-)$ | -5.03                     | -1.65         |
| $Li_3O_4 * + (Li^+ + e^-) \leftrightarrow Li_4O_4 *$                       | -4.05                     | -0.59         |

### References:

1. M. D, Esrafil, A. A. Khan, P. Mousavian, *RSC Adv.*, 2021, **11**, 22598 -22610.
2. D. A, McQuarrie, Harper & Row, 1973
